# Supplementary material
Source: publisher site journal article supplement (https://www.spandidos-publications.com/8231/downloadSupplementary)

Figure S1. Distribution of propensity scores and logit-transformed scores for the LGI endoscopy and non-endoscopy groups. LGI, lower gastrointestinal.

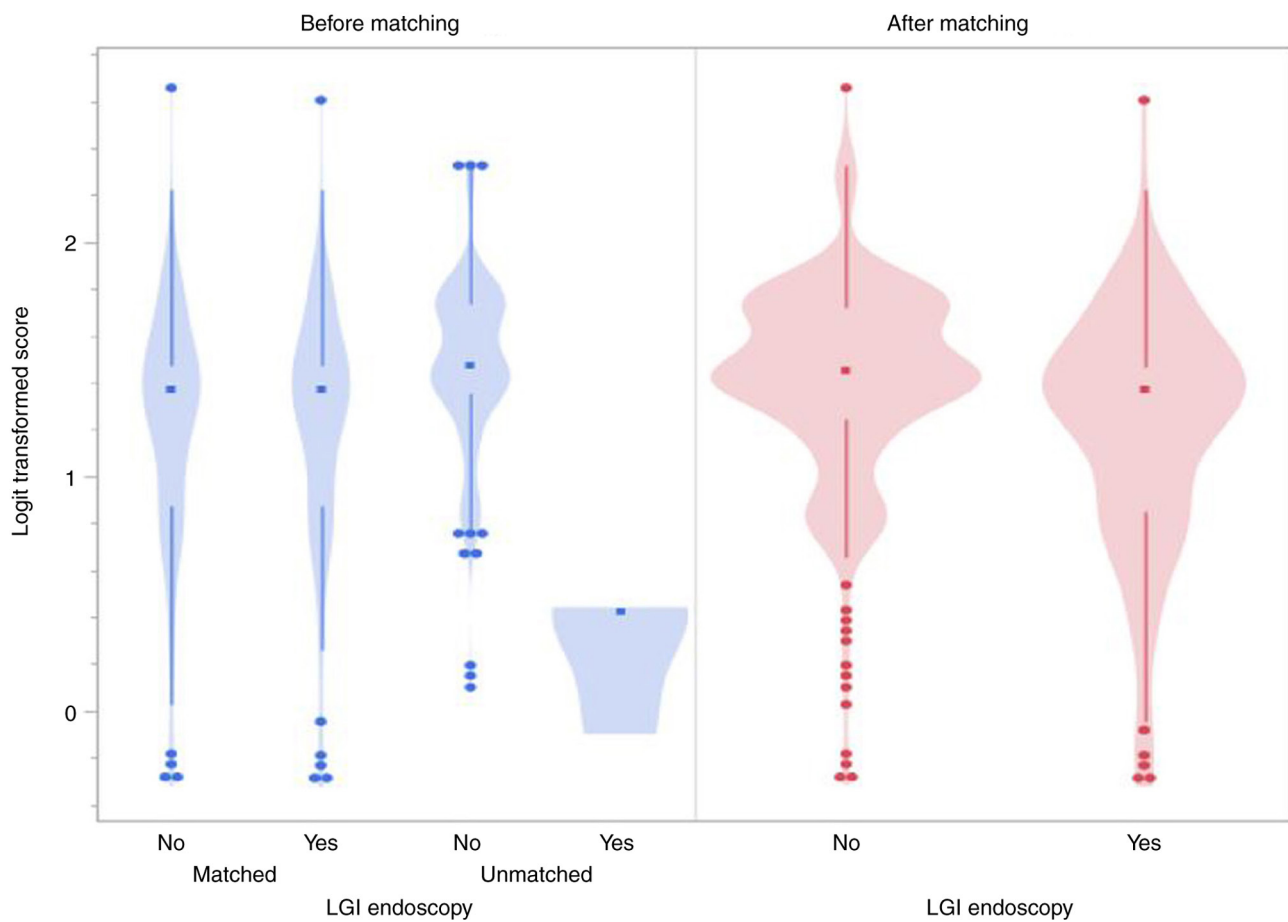

Supplement: Supplementary file 1 [file downloadSupplementary]
